# Supplementary material for: Performance of FRAX in clinical practice according to sex and osteoporosis definitions: the Manitoba BMD registry
Source: Springer Nature journal article supplement (doi:10.1007/s00198-018-4415-y), 2018-02-05
Supplement: MOESM1 [file 15441282]

**Supplemental Table 1: Guidelines for Bone Density Testing in the Manitoba BMD Program (**<https://www.gov.mb.ca/health/primarycare/public/chronicdisease/bonedensity/index.html>**).**

- Vertebral low-trauma (fragility) fracture proven by x-ray
- Non-vertebral fragility fracture proven by x-ray
- Osteopenia or osteoporosis identified on x-ray
- Systemic corticosteroid therapy for more than 3 months in the last year
- Aromatase inhibitor therapy for breast cancer
- Prolonged amenorrhea, surgical menopause or premature menopause prior to age 45
- Woman age 65 or older (screening in men, and in women younger than age 65, are not approved indications unless additional risk factors are provided)
- Follow up of a previous bone density measurement (recommended initial interval 3 years for most patients, at least 5 years if previously reported as low risk, 1 year in patients on systemic corticosteroid therapy or aromatase inhibitors)
- Other indications may be considered if appropriate clinical justification is provided.

**Supplemental Table 2. Detailed breakdown of study population characteristics for women, stratified by osteoporosis and risk subgroup.**

|  | Osteoporosis (WHO) | Osteoporosis (NOF, not WHO) | High fracture risk, no osteoporosis | Low fracture risk, no osteoporosis | P |
| --- | --- | --- | --- | --- | --- |
|  | N=7577 | N=7941 | N=5844 | N=40,913 |  |
| Age (years) | 72.8 ± 10.2 | 67.6 ± 9.8 | 77.3 ± 6.5 | 59.9 ± 9.2 | <0.001 |
| Body mass index (kg/m2) | 24.1 ± 4.6 | 25.6 ± 4.7 | 27.4 ± 4.7 | 27.8 ± 5.7 | <0.001 |
| Prior fracture | 2132 (28.1) | 1597 (20.1) | 1569 (26.8) | 3535 (8.6) | <0.001 |
| Parental hip fracture | 409 (5.4) | 455 (5.7) | 726 (12.4) | 2062 (5.0) | <0.001 |
| Chronic obstructive lung disease | 908 (12.0) | 730 (9.2) | 960 (16.4) | 2434 (5.9) | <0.001 |
| Prolonged glucocorticoid use | 410 (5.4) | 337 (4.2) | 467 (8.0) | 1347 (3.3) | <0.001 |
| Rheumatoid arthritis | 343 (4.5) | 245 (3.1) | 304 (5.2) | 1168 (2.9) | <0.001 |
| Alcohol abuse | 238 (3.1) | 204 (2.6) | 171 (2.9) | 1129 (2.8) | 0.146 |
| Femoral neck T-score | -2.9 ± 0.4 | -1.9 ± 0.5 | -1.9 ± 0.4 | -0.9 ± 0.8 | <0.001 |
| FRAX 10-year major osteoporotic fracture risk (%) | 24.0 ± 10.6 | 13.1 ± 6.3 | 18.1 ± 4.9 | 7.0 ± 3.3 | <0.001 |
| FRAX 10-year hip fracture risk (%) | 10.1 ± 7.8 | 3.2 ± 3.2 | 5.5 ± 3.2 | 0.7 ± 0.7 | <0.001 |
| Incident MOF | 1496 (19.7) | 952 (12.0) | 770 (13.2) | 2127 (5.2) | <0.001 |
| Incident hip fracture | 632 (8.3) | 211 (2.7) | 294 (5.0) | 334 (0.8) | <0.001 |
| Deaths | 2198 (29.0) | 1113 (14.0) | 1540 (26.4) | 2656 (6.5) | <0.001 |

Data are mean ± SD or N (%). P value is for analysis of variance (ANOVA).

**Supplemental Table 3. Detailed breakdown of study population characteristics for men, stratified by osteoporosis and risk subgroup.**

|  | Osteoporosis (WHO) | Osteoporosis (NOF, not WHO) | High fracture risk, no osteoporosis | Low fracture risk, no osteoporosis | P |
| --- | --- | --- | --- | --- | --- |
|  | N=540 | N=981 | N=790 | N=4144 |  |
| Age (years) | 71.2 ± 12.2 | 66.0 ± 12.6 | 77.6 ± 7.1 | 63.1 ± 11.3 | <0.001 |
| Body mass index (kg/m2) | 24.6 ± 4.6 | 25.5 ± 4.2 | 26.7 ± 3.9 | 28.6 ± 25.4 | <0.001 |
| Prior fracture | 2526 (33.3) | 1927 (24.3) | 1635 (28.0) | 5331 (13.0) | <0.001 |
| Parental hip fracture | 505 (6.7) | 567 (7.1) | 792 (13.5) | 1925 (4.7) | <0.001 |
| Chronic obstructive lung disease | 1908 (25.2) | 1271 (16.0) | 1694 (29.0) | 3495 (8.5) | <0.001 |
| Prolonged glucocorticoid use | 1235 (16.3) | 1392 (17.5) | 1738 (29.7) | 7158 (17.5) | <0.001 |
| Rheumatoid arthritis | 603 (8.0) | 429 (5.4) | 607 (10.4) | 1846 (4.5) | <0.001 |
| Alcohol abuse | 463 (6.1) | 518 (6.5) | 392 (6.7) | 1856 (4.5) | <0.001 |
| Femoral neck T-score | -2.9 ± 0.4 | -1.9 ± 0.5 | -1.5 ± 0.5 | -0.6 ± 0.9 | <0.001 |
| FRAX 10-year major osteoporotic fracture risk (%) | 17.1 ± 7.5 | 10.3 ± 5.1 | 11.5 ± 3.5 | 5.6 ± 2.4 | <0.001 |
| FRAX 10-year hip fracture risk (%) | 9.3 ± 6.1 | 3.9 ± 3.7 | 5.1 ± 2.7 | 0.9 ± 0.8 | <0.001 |
| Incident MOF | 996 (13.1) | 785 (9.9) | 525 (9.0) | 1639 (4.0) | <0.001 |
| Incident hip fracture | 463 (6.1) | 227 (2.9) | 141 (2.4) | 276 (0.7) | <0.001 |
| Deaths | 3227 (42.6) | 2153 (27.1) | 2375 (40.6) | 6654 (16.3) | <0.001 |

Data are mean ± SD or N (%). P value is for analysis of variance (ANOVA).
